# Supplementary material for: Accuracy of acute burns diagnosis made using smartphones and tablets: a questionnaire-based study among medical experts
Source: BMC Emerg Med. 2017 Dec 13;17:39. doi: 10.1186/s12873-017-0151-4 (PMC5729255; doi:10.1186/s12873-017-0151-4)
Supplement: Additional file 1: — Raw data for Table S4 and S6. The file contains raw data for Tables S4 and S6 with assessments of TBSA and depth for each image and participant. Participant 1 is the bedside diagnosis which is used as the gold standard for all analyses. Participant 1 was not used for reliability analyses. (XLSX 42 kb) [file 12873_2017_151_MOESM1_ESM.xlsx]

## Sheet: Notes
Notes regarding the database:
Participant 1 is the bedside diagnosis used as the gold standard for all analyses. It was not used for reliability analyses.

## Sheet: Raw data for table 4 and 6
Image	Participant	TBSA	Depth	Age group
1	1	0.5	Superficial partial thickness	Child
1	2	1	Superficial partial thickness	Child
1	3	1	Superficial partial thickness	Child
1	4	1	Superficial partial thickness	Child
1	5	1	Superficial partial thickness	Child
1	6	1.5	Superficial partial thickness	Child
1	7	0.5	Superficial partial thickness	Child
1	8	0.5	Superficial partial thickness	Child
1	9	1	Mid partial thickness/indeterminate	Child
1	10	1	Mid partial thickness/indeterminate	Child
1	11	1	Superficial partial thickness	Child
1	12	3	Superficial partial thickness	Child
1	13	0.5	Superficial partial thickness	Child
1	14	0.5	Superficial partial thickness	Child
1	15	1	Superficial partial thickness	Child
1	16	1	Superficial partial thickness	Child
1	17	1	Mid partial thickness/indeterminate	Child
1	18	1	Superficial partial thickness	Child
1	19	1	Superficial partial thickness	Child
1	20	1	Superficial partial thickness	Child
1	21	1.5	Mid partial thickness/indeterminate	Child
1	22	1	Superficial partial thickness	Child
1	23	1	Mid partial thickness/indeterminate	Child
1	24	0.5	Superficial partial thickness	Child
1	25	1	Superficial partial thickness	Child
1	26	0.5	Superficial partial thickness	Child
1	27	1.25	Mid partial thickness/indeterminate	Child
2	1	4	Superficial partial thickness	Child
2	2	5	Superficial partial thickness	Child
2	3	6	Deep partial thickness	Child
2	4	9	Deep partial thickness	Child
2	5	3	Deep partial thickness	Child
2	6	4	Mid partial thickness/indeterminate	Child
2	7	3	Mid partial thickness/indeterminate	Child
2	8	4	Mid partial thickness/indeterminate	Child
2	9	4	Deep partial thickness	Child
2	10	4	Deep partial thickness	Child
2	11	8	Deep partial thickness	Child
2	12	14	Deep partial thickness	Child
2	13	4	-	Child
2	14	4	Superficial partial thickness	Child
2	15	3	Deep partial thickness	Child
2	16	5	Deep partial thickness	Child
2	17	4.5	Full thickness	Child
2	18	7	Deep partial thickness	Child
2	19	9	Deep partial thickness	Child
2	20	7	Mid partial thickness/indeterminate	Child
2	21	3	Deep partial thickness	Child
2	22	6	Mid partial thickness/indeterminate	Child
2	23	6	Deep partial thickness	Child
2	24	6	Mid partial thickness/indeterminate	Child
2	25	4	Deep partial thickness	Child
2	26	4	Deep partial thickness	Child
2	27	4.5	Deep partial thickness	Child
3	1	4	Superficial partial thickness	Child
3	2	4	Superficial partial thickness	Child
3	3	6	Mid partial thickness/indeterminate	Child
3	4	8	Deep partial thickness	Child
3	5	7	Mid partial thickness/indeterminate	Child
3	6	4.5	Superficial partial thickness	Child
3	7	4.5	Deep partial thickness	Child
3	8	5	Superficial partial thickness	Child
3	9	5	Deep partial thickness	Child
3	10	5	Mid partial thickness/indeterminate	Child
3	11	9	Deep partial thickness	Child
3	12	9	Mid partial thickness/indeterminate	Child
3	13	5	Mid partial thickness/indeterminate	Child
3	14	5	Mid partial thickness/indeterminate	Child
3	15	3	Deep partial thickness	Child
3	16	5	Superficial partial thickness	Child
3	17	5	Deep partial thickness	Child
3	18	9	Mid partial thickness/indeterminate	Child
3	19	3	Deep partial thickness	Child
3	20	8	Mid partial thickness/indeterminate	Child
3	21	4	Superficial partial thickness	Child
3	22	4	Mid partial thickness/indeterminate	Child
3	23	5	Deep partial thickness	Child
3	24	6.5	Mid partial thickness/indeterminate	Child
3	25	5	Mid partial thickness/indeterminate	Child
3	26	4	Deep partial thickness	Child
3	27	7	Mid partial thickness/indeterminate	Child
4	1	4	Mid partial thickness/indeterminate	Child
4	2	4	Deep partial thickness	Child
4	3	5	Mid partial thickness/indeterminate	Child
4	4	8	Deep partial thickness	Child
4	5	5	Deep partial thickness	Child
4	6	5	Superficial partial thickness	Child
4	7	4	Deep partial thickness	Child
4	8	3	Mid partial thickness/indeterminate	Child
4	9	5	Mid partial thickness/indeterminate	Child
4	10	3.5	Mid partial thickness/indeterminate	Child
4	11	4.5	Superficial partial thickness	Child
4	12	6	Deep partial thickness	Child
4	13	5	Deep partial thickness	Child
4	14	4	Deep partial thickness	Child
4	15	4	Deep partial thickness	Child
4	16	6	Mid partial thickness/indeterminate	Child
4	17	4.5	Deep partial thickness	Child
4	18	4	Mid partial thickness/indeterminate	Child
4	19	4	Mid partial thickness/indeterminate	Child
4	20	5	Deep partial thickness	Child
4	21	3	Deep partial thickness	Child
4	22	6	Mid partial thickness/indeterminate	Child
4	23	5	Deep partial thickness	Child
4	24	3.5	Superficial partial thickness	Child
4	25	8	Deep partial thickness	Child
4	26	4.5	Mid partial thickness/indeterminate	Child
4	27	4.5	Deep partial thickness	Child
5	1	4	Full thickness	Child
5	2	4	Mid partial thickness/indeterminate	Child
5	3	5	Full thickness	Child
5	4	10	Full thickness	Child
5	5	4	Deep partial thickness	Child
5	6	5.5	Full thickness	Child
5	7	4	Deep partial thickness	Child
5	8	3	Deep partial thickness	Child
5	9	4	Deep partial thickness	Child
5	10	3.5	Full thickness	Child
5	11	8	Deep partial thickness	Child
5	12	10	Full thickness	Child
5	13	5	Deep partial thickness	Child
5	14	3.5	Mid partial thickness/indeterminate	Child
5	15	4	Full thickness	Child
5	16	4	Full thickness	Child
5	17	4	Deep partial thickness	Child
5	18	7	Deep partial thickness	Child
5	19	6	Full thickness	Child
5	20	6	Mid partial thickness/indeterminate	Child
5	21	4	Deep partial thickness	Child
5	22	5	Deep partial thickness	Child
5	23	5	Deep partial thickness	Child
5	24	3	Deep partial thickness	Child
5	25	5	Deep partial thickness	Child
5	26	3	Deep partial thickness	Child
5	27	3	Full thickness	Child
6	1	0.5	Superficial partial thickness	Child
6	2	1	Superficial partial thickness	Child
6	3	1	Superficial partial thickness	Child
6	4	1	Superficial partial thickness	Child
6	5	1	Superficial partial thickness	Child
6	6	1	Mid partial thickness/indeterminate	Child
6	7	1	-	Child
6	8	1	-	Child
6	9	1	Mid partial thickness/indeterminate	Child
6	10	1	Mid partial thickness/indeterminate	Child
6	11	1	Mid partial thickness/indeterminate	Child
6	12	3	Superficial partial thickness	Child
6	13	0.5	-	Child
6	14	0.5	Superficial partial thickness	Child
6	15	2	Superficial partial thickness	Child
6	16	1	Superficial partial thickness	Child
6	17	1	Mid partial thickness/indeterminate	Child
6	18	1	Mid partial thickness/indeterminate	Child
6	19	2	Mid partial thickness/indeterminate	Child
6	20	1	Superficial partial thickness	Child
6	21	0.75	Superficial partial thickness	Child
6	22	0.5	Superficial partial thickness	Child
6	23	1	Mid partial thickness/indeterminate	Child
6	24	0.6	Superficial partial thickness	Child
6	25	0.5	Full thickness	Child
6	26	0.5	Superficial partial thickness	Child
6	27	0.5	Mid partial thickness/indeterminate	Child
7	1	0.5	Full thickness	Child
7	2	1	Full thickness	Child
7	3	1	Full thickness	Child
7	4	1	Full thickness	Child
7	5	1	Full thickness	Child
7	6	1	Full thickness	Child
7	7	0.1	Full thickness	Child
7	8	0.2	Full thickness	Child
7	9	1	Superficial partial thickness	Child
7	10	1	Full thickness	Child
7	11	1	Full thickness	Child
7	12	3	Full thickness	Child
7	13	0.5	Full thickness	Child
7	14	0.1	Full thickness	Child
7	15	1	Deep partial thickness	Child
7	16	1	Full thickness	Child
7	17	1	Deep partial thickness	Child
7	18	1	Full thickness	Child
7	19	1	Full thickness	Child
7	20	1	Full thickness	Child
7	21	0.2	Full thickness	Child
7	22	0.25	Full thickness	Child
7	23	1	Full thickness	Child
7	24	0.3	Full thickness	Child
7	25	0.5	Full thickness	Child
7	26	0.2	Full thickness	Child
7	27	0.5	Full thickness	Child
8	1	1	Superficial partial thickness	Child
8	2	2	Superficial partial thickness	Child
8	3	1.5	Superficial partial thickness	Child
8	4	2	Mid partial thickness/indeterminate	Child
8	5	1.5	Deep partial thickness	Child
8	6	1	Superficial partial thickness	Child
8	7	1.5	Deep partial thickness	Child
8	8	1	Superficial partial thickness	Child
8	9	1	Deep partial thickness	Child
8	10	1	Deep partial thickness	Child
8	11	1	Deep partial thickness	Child
8	12	4	Mid partial thickness/indeterminate	Child
8	13	0.5	Superficial partial thickness	Child
8	14	1.5	Superficial partial thickness	Child
8	15	2	Superficial partial thickness	Child
8	16	1	Superficial partial thickness	Child
8	17	2	Mid partial thickness/indeterminate	Child
8	18	1	Mid partial thickness/indeterminate	Child
8	19	1	Mid partial thickness/indeterminate	Child
8	20	2	Mid partial thickness/indeterminate	Child
8	21	1.5	Mid partial thickness/indeterminate	Child
8	22	2	Superficial partial thickness	Child
8	23	3	Full thickness	Child
8	24	1	Mid partial thickness/indeterminate	Child
8	25	1	Deep partial thickness	Child
8	26	1	Deep partial thickness	Child
8	27	1.5	Mid partial thickness/indeterminate	Child
9	1	1.5	Deep partial thickness	Child
9	2	2	Deep partial thickness	Child
9	3	2	Deep partial thickness	Child
9	4	3	Deep partial thickness	Child
9	5	2	Deep partial thickness	Child
9	6	6	Deep partial thickness	Child
9	7	2	Full thickness	Child
9	8	1.5	Deep partial thickness	Child
9	9	2	Deep partial thickness	Child
9	10	2	Full thickness	Child
9	11	2	Full thickness	Child
9	12	5	Full thickness	Child
9	13	1	Deep partial thickness	Child
9	14	1.5	Deep partial thickness	Child
9	15	2	Full thickness	Child
9	16	2	Deep partial thickness	Child
9	17	2	Full thickness	Child
9	18	2	Deep partial thickness	Child
9	19	4	Full thickness	Child
9	20	3	Full thickness	Child
9	21	2	Full thickness	Child
9	22	2	Mid partial thickness/indeterminate	Child
9	23	2	Full thickness	Child
9	24	1.5	Deep partial thickness	Child
9	25	2	Full thickness	Child
9	26	1.5	Full thickness	Child
9	27	2	Full thickness	Child
10	1	2	Superficial partial thickness	Child
10	2	2	Mid partial thickness/indeterminate	Child
10	3	2	Superficial partial thickness	Child
10	4	3	Deep partial thickness	Child
10	5	2	Deep partial thickness	Child
10	6	3.5	Superficial partial thickness	Child
10	7	2.5	Deep partial thickness	Child
10	8	2	Superficial partial thickness	Child
10	9	3	Mid partial thickness/indeterminate	Child
10	10	2.5	Deep partial thickness	Child
10	11	3	Deep partial thickness	Child
10	12	4	Deep partial thickness	Child
10	13	2	Deep partial thickness	Child
10	14	2.5	Deep partial thickness	Child
10	15	3	Deep partial thickness	Child
10	16	3	Mid partial thickness/indeterminate	Child
10	17	3	Deep partial thickness	Child
10	18	3	Full thickness	Child
10	19	3	Deep partial thickness	Child
10	20	3	Mid partial thickness/indeterminate	Child
10	21	2	Deep partial thickness	Child
10	22	2	Mid partial thickness/indeterminate	Child
10	23	2	Deep partial thickness	Child
10	24	2.5	Mid partial thickness/indeterminate	Child
10	25	3	Full thickness	Child
10	26	4	Mid partial thickness/indeterminate	Child
10	27	3	Deep partial thickness	Child
11	1	1	Mid partial thickness/indeterminate	Child
11	2	1	Superficial partial thickness	Child
11	3	1	Superficial partial thickness	Child
11	4	3	Full thickness	Child
11	5	1.5	Mid partial thickness/indeterminate	Child
11	6	3	Deep partial thickness	Child
11	7	2	Superficial partial thickness	Child
11	8	2	Superficial partial thickness	Child
11	9	2	Mid partial thickness/indeterminate	Child
11	10	4	Mid partial thickness/indeterminate	Child
11	11	2	Mid partial thickness/indeterminate	Child
11	12	5	Superficial partial thickness	Child
11	13	2	Mid partial thickness/indeterminate	Child
11	14	1.5	Mid partial thickness/indeterminate	Child
11	15	4	Deep partial thickness	Child
11	16	2	Superficial partial thickness	Child
11	17	2	Deep partial thickness	Child
11	18	3	Mid partial thickness/indeterminate	Child
11	19	3	Mid partial thickness/indeterminate	Child
11	20	3	Mid partial thickness/indeterminate	Child
11	21	2	Deep partial thickness	Child
11	22	3	Mid partial thickness/indeterminate	Child
11	23	3	Mid partial thickness/indeterminate	Child
11	24	1.5	Mid partial thickness/indeterminate	Child
11	25	1	Superficial partial thickness	Child
11	26	1	Mid partial thickness/indeterminate	Child
11	27	1.5	Deep partial thickness	Child
12	1	1.5	Deep partial thickness	Child
12	2	2	Mid partial thickness/indeterminate	Child
12	3	1	Superficial partial thickness	Child
12	4	4	Full thickness	Child
12	5	4	Deep partial thickness	Child
12	6	3.5	Deep partial thickness	Child
12	7	2	Mid partial thickness/indeterminate	Child
12	8	2	Mid partial thickness/indeterminate	Child
12	9	2	Mid partial thickness/indeterminate	Child
12	10	2	Deep partial thickness	Child
12	11	5	Deep partial thickness	Child
12	12	5	Full thickness	Child
12	13	2	Deep partial thickness	Child
12	14	1.5	Mid partial thickness/indeterminate	Child
12	15	4	Deep partial thickness	Child
12	16	2	Full thickness	Child
12	17	2	Full thickness	Child
12	18	7	Deep partial thickness	Child
12	19	4	Full thickness	Child
12	20	2	Full thickness	Child
12	21	1.5	Deep partial thickness	Child
12	22	4	Deep partial thickness	Child
12	23	3	Deep partial thickness	Child
12	24	1	Deep partial thickness	Child
12	25	1	Mid partial thickness/indeterminate	Child
12	26	2	Deep partial thickness	Child
12	27	2	Full thickness	Child
13	1	2	Superficial partial thickness	Child
13	2	4	Superficial partial thickness	Child
13	3	4	Superficial partial thickness	Child
13	4	6	Mid partial thickness/indeterminate	Child
13	5	5	Superficial partial thickness	Child
13	6	3.5	Superficial partial thickness	Child
13	7	4	Superficial partial thickness	Child
13	8	3	Superficial partial thickness	Child
13	9	5	Deep partial thickness	Child
13	10	7	Deep partial thickness	Child
13	11	5	Mid partial thickness/indeterminate	Child
13	12	10	Superficial partial thickness	Child
13	13	3	Superficial partial thickness	Child
13	14	2.5	Superficial partial thickness	Child
13	15	4	Mid partial thickness/indeterminate	Child
13	16	4	Mid partial thickness/indeterminate	Child
13	17	9	Mid partial thickness/indeterminate	Child
13	18	4	Superficial partial thickness	Child
13	19	8	Mid partial thickness/indeterminate	Child
13	20	7	Mid partial thickness/indeterminate	Child
13	21	3.5	Superficial partial thickness	Child
13	22	5	Mid partial thickness/indeterminate	Child
13	23	7	Mid partial thickness/indeterminate	Child
13	24	4	Mid partial thickness/indeterminate	Child
13	25	4	Mid partial thickness/indeterminate	Child
13	26	3	Mid partial thickness/indeterminate	Child
13	27	3.5	Mid partial thickness/indeterminate	Child
14	1	4	Superficial partial thickness	Child
14	2	5	Superficial partial thickness	Child
14	3	5	Superficial partial thickness	Child
14	4	6	Deep partial thickness	Child
14	5	10	Superficial partial thickness	Child
14	6	3	Mid partial thickness/indeterminate	Child
14	7	4	Superficial partial thickness	Child
14	8	6	Superficial partial thickness	Child
14	9	7	Deep partial thickness	Child
14	10	3	Mid partial thickness/indeterminate	Child
14	11	10	Mid partial thickness/indeterminate	Child
14	12	11	Mid partial thickness/indeterminate	Child
14	13	3	Superficial partial thickness	Child
14	14	6	Superficial partial thickness	Child
14	15	4	Mid partial thickness/indeterminate	Child
14	16	7	Superficial partial thickness	Child
14	17	6	Mid partial thickness/indeterminate	Child
14	18	9	Superficial partial thickness	Child
14	19	5	Mid partial thickness/indeterminate	Child
14	20	6	Superficial partial thickness	Child
14	21	9	Mid partial thickness/indeterminate	Child
14	22	7	Mid partial thickness/indeterminate	Child
14	23	7	Deep partial thickness	Child
14	24	3.5	Mid partial thickness/indeterminate	Child
14	25	5	Mid partial thickness/indeterminate	Child
14	26	3.5	Mid partial thickness/indeterminate	Child
14	27	5	Mid partial thickness/indeterminate	Child
15	1	7	Deep partial thickness	Child
15	2	8	Deep partial thickness	Child
15	3	7	Mid partial thickness/indeterminate	Child
15	4	12	Deep partial thickness	Child
15	5	8	Deep partial thickness	Child
15	6	9	Deep partial thickness	Child
15	7	5	Deep partial thickness	Child
15	8	4	Mid partial thickness/indeterminate	Child
15	9	8	Mid partial thickness/indeterminate	Child
15	10	8	Deep partial thickness	Child
15	11	18	Deep partial thickness	Child
15	12	10	Deep partial thickness	Child
15	13	7	Deep partial thickness	Child
15	14	13	Deep partial thickness	Child
15	15	6	Deep partial thickness	Child
15	16	6	Mid partial thickness/indeterminate	Child
15	17	9	Full thickness	Child
15	18	9	Mid partial thickness/indeterminate	Child
15	19	9	Full thickness	Child
15	20	10	Mid partial thickness/indeterminate	Child
15	21	8	Full thickness	Child
15	22	9	Mid partial thickness/indeterminate	Child
15	23	10	Full thickness	Child
15	24	6	Mid partial thickness/indeterminate	Child
15	25	6	Deep partial thickness	Child
15	26	7	Deep partial thickness	Child
15	27	7	Deep partial thickness	Child
16	1	1	Superficial partial thickness	Child
16	2	2	Superficial partial thickness	Child
16	3	1	Mid partial thickness/indeterminate	Child
16	4	2	Mid partial thickness/indeterminate	Child
16	5	1	Mid partial thickness/indeterminate	Child
16	6	2	Superficial partial thickness	Child
16	7	2	Superficial partial thickness	Child
16	8	1	Superficial partial thickness	Child
16	9	2	Mid partial thickness/indeterminate	Child
16	10	2.5	Deep partial thickness	Child
16	11	3	Deep partial thickness	Child
16	12	4	Superficial partial thickness	Child
16	13	1	Mid partial thickness/indeterminate	Child
16	14	1.5	Mid partial thickness/indeterminate	Child
16	15	3	Deep partial thickness	Child
16	16	3	Superficial partial thickness	Child
16	17	4	Mid partial thickness/indeterminate	Child
16	18	2	Mid partial thickness/indeterminate	Child
16	19	1	Deep partial thickness	Child
16	20	1	Superficial partial thickness	Child
16	21	2.5	Superficial partial thickness	Child
16	22	2	Superficial partial thickness	Child
16	23	2	-	Child
16	24	2	Deep partial thickness	Child
16	25	2	Mid partial thickness/indeterminate	Child
16	26	1.5	Mid partial thickness/indeterminate	Child
16	27	1.5	Mid partial thickness/indeterminate	Child
17	1	4	Superficial partial thickness	Child
17	2	4	Superficial partial thickness	Child
17	3	8	Superficial partial thickness	Child
17	4	4	Deep partial thickness	Child
17	5	6	Superficial partial thickness	Child
17	6	6	Superficial partial thickness	Child
17	7	4	Mid partial thickness/indeterminate	Child
17	8	2.5	Superficial partial thickness	Child
17	9	3	Mid partial thickness/indeterminate	Child
17	10	4	Deep partial thickness	Child
17	11	9	Deep partial thickness	Child
17	12	10	Mid partial thickness/indeterminate	Child
17	13	3	Superficial partial thickness	Child
17	14	4	Superficial partial thickness	Child
17	15	5	Mid partial thickness/indeterminate	Child
17	16	5	Superficial partial thickness	Child
17	17	4.5	Mid partial thickness/indeterminate	Child
17	18	4	Superficial partial thickness	Child
17	19	1	Mid partial thickness/indeterminate	Child
17	20	4	Mid partial thickness/indeterminate	Child
17	21	4	Superficial partial thickness	Child
17	22	4	Superficial partial thickness	Child
17	23	5	Mid partial thickness/indeterminate	Child
17	24	7	Mid partial thickness/indeterminate	Child
17	25	9	Deep partial thickness	Child
17	26	3.5	Superficial partial thickness	Child
17	27	4.5	Deep partial thickness	Child
18	1	5	Superficial partial thickness	Child
18	2	5	Superficial partial thickness	Child
18	3	5	Mid partial thickness/indeterminate	Child
18	4	5	Superficial partial thickness	Child
18	5	6	Mid partial thickness/indeterminate	Child
18	6	5	Superficial partial thickness	Child
18	7	5	Superficial partial thickness	Child
18	8	3	Superficial partial thickness	Child
18	9	4	Deep partial thickness	Child
18	10	5	Mid partial thickness/indeterminate	Child
18	11	9	Deep partial thickness	Child
18	12	6	Superficial partial thickness	Child
18	13	3	Mid partial thickness/indeterminate	Child
18	14	5	Mid partial thickness/indeterminate	Child
18	15	6	Deep partial thickness	Child
18	16	5	Superficial partial thickness	Child
18	17	7	Mid partial thickness/indeterminate	Child
18	18	5	Mid partial thickness/indeterminate	Child
18	19	1	Deep partial thickness	Child
18	20	3	Mid partial thickness/indeterminate	Child
18	21	5	Deep partial thickness	Child
18	22	5	Superficial partial thickness	Child
18	23	5	Mid partial thickness/indeterminate	Child
18	24	7	Deep partial thickness	Child
18	25	8	Deep partial thickness	Child
18	26	4	Superficial partial thickness	Child
18	27	6	Mid partial thickness/indeterminate	Child
19	1	6	Full thickness	Child
19	2	10	Mid partial thickness/indeterminate	Child
19	3	7	Full thickness	Child
19	4	9	Deep partial thickness	Child
19	5	11	Deep partial thickness	Child
19	6	7.5	Deep partial thickness	Child
19	7	6.5	Deep partial thickness	Child
19	8	4	Mid partial thickness/indeterminate	Child
19	9	5	Deep partial thickness	Child
19	10	7	Mid partial thickness/indeterminate	Child
19	11	10	Deep partial thickness	Child
19	12	12	Full thickness	Child
19	13	4.5	Full thickness	Child
19	14	8	Deep partial thickness	Child
19	15	18	Deep partial thickness	Child
19	16	7	Mid partial thickness/indeterminate	Child
19	17	4.5	Deep partial thickness	Child
19	18	9	Full thickness	Child
19	19	1	Deep partial thickness	Child
19	20	6	Deep partial thickness	Child
19	21	6.5	Full thickness	Child
19	22	6	Mid partial thickness/indeterminate	Child
19	23	5	Deep partial thickness	Child
19	24	9	Mid partial thickness/indeterminate	Child
19	25	5	Full thickness	Child
19	26	8	Mid partial thickness/indeterminate	Child
19	27	6	Full thickness	Child
20	1	9	Superficial partial thickness	Child
20	2	9	Superficial partial thickness	Child
20	3	8	Superficial partial thickness	Child
20	4	18	Deep partial thickness	Child
20	5	12	Superficial partial thickness	Child
20	6	9	Superficial partial thickness	Child
20	7	9	Superficial partial thickness	Child
20	8	10	Superficial partial thickness	Child
20	9	5	Deep partial thickness	Child
20	10	8	Mid partial thickness/indeterminate	Child
20	11	18	Deep partial thickness	Child
20	12	14	Mid partial thickness/indeterminate	Child
20	13	4.5	Superficial partial thickness	Child
20	14	9	Superficial partial thickness	Child
20	15	18	Mid partial thickness/indeterminate	Child
20	16	12	Mid partial thickness/indeterminate	Child
20	17	18	Mid partial thickness/indeterminate	Child
20	18	9	Superficial partial thickness	Child
20	19	2	Mid partial thickness/indeterminate	Child
20	20	8	Superficial partial thickness	Child
20	21	4.5	Mid partial thickness/indeterminate	Child
20	22	8	Superficial partial thickness	Child
20	23	7	Superficial partial thickness	Child
20	24	8	Superficial partial thickness	Child
20	25	18	Mid partial thickness/indeterminate	Child
20	26	4	Superficial partial thickness	Child
20	27	10	Deep partial thickness	Child
21	1	2	Superficial partial thickness	Child
21	2	2	Superficial partial thickness	Child
21	3	2	Superficial partial thickness	Child
21	4	4	Deep partial thickness	Child
21	5	3	Superficial partial thickness	Child
21	6	3	Superficial partial thickness	Child
21	7	3	Superficial partial thickness	Child
21	8	1.5	Superficial partial thickness	Child
21	9	2	Mid partial thickness/indeterminate	Child
21	10	2	Mid partial thickness/indeterminate	Child
21	11	7	Mid partial thickness/indeterminate	Child
21	12	6	Superficial partial thickness	Child
21	13	2	Superficial partial thickness	Child
21	14	1.5	Superficial partial thickness	Child
21	15	5	Deep partial thickness	Child
21	16	3	Mid partial thickness/indeterminate	Child
21	17	4	Mid partial thickness/indeterminate	Child
21	18	3	Superficial partial thickness	Child
21	19	3	Superficial partial thickness	Child
21	20	2	Superficial partial thickness	Child
21	21	2.5	Superficial partial thickness	Child
21	22	3	Superficial partial thickness	Child
21	23	2	Superficial partial thickness	Child
21	24	3	Superficial partial thickness	Child
21	25	2	Mid partial thickness/indeterminate	Child
21	26	1.5	Mid partial thickness/indeterminate	Child
21	27	5	Mid partial thickness/indeterminate	Child
22	1	5	Superficial partial thickness	Child
22	2	5	Superficial partial thickness	Child
22	3	12	Superficial partial thickness	Child
22	4	7	Superficial partial thickness	Child
22	5	6	Superficial partial thickness	Child
22	6	8	Superficial partial thickness	Child
22	7	5	Superficial partial thickness	Child
22	8	6	Superficial partial thickness	Child
22	9	5	Deep partial thickness	Child
22	10	5	Mid partial thickness/indeterminate	Child
22	11	9	Deep partial thickness	Child
22	12	16	Mid partial thickness/indeterminate	Child
22	13	4	Superficial partial thickness	Child
22	14	6	Superficial partial thickness	Child
22	15	5	Mid partial thickness/indeterminate	Child
22	16	10	Mid partial thickness/indeterminate	Child
22	17	9	Deep partial thickness	Child
22	18	9	Mid partial thickness/indeterminate	Child
22	19	9	Mid partial thickness/indeterminate	Child
22	20	8	Mid partial thickness/indeterminate	Child
22	21	6	Superficial partial thickness	Child
22	22	7	Superficial partial thickness	Child
22	23	5	Mid partial thickness/indeterminate	Child
22	24	7	Mid partial thickness/indeterminate	Child
22	25	10	Deep partial thickness	Child
22	26	4.5	Superficial partial thickness	Child
22	27	6	Mid partial thickness/indeterminate	Child
23	1	6	Deep partial thickness	Child
23	2	9	Full thickness	Child
23	3	7	Full thickness	Child
23	4	5	Deep partial thickness	Child
23	5	9	Full thickness	Child
23	6	12	Full thickness	Child
23	7	-	-	Child
23	8	7	Full thickness	Child
23	9	7	Superficial partial thickness	Child
23	10	6.5	Deep partial thickness	Child
23	11	10	Deep partial thickness	Child
23	12	12	Deep partial thickness	Child
23	13	4	Full thickness	Child
23	14	8	Full thickness	Child
23	15	6	Mid partial thickness/indeterminate	Child
23	16	8	Deep partial thickness	Child
23	17	10	Full thickness	Child
23	18	9	Full thickness	Child
23	19	10	Full thickness	Child
23	20	10	Full thickness	Child
23	21	6	Full thickness	Child
23	22	9	Full thickness	Child
23	23	8	Full thickness	Child
23	24	9	Mid partial thickness/indeterminate	Child
23	25	5	Full thickness	Child
23	26	6	Mid partial thickness/indeterminate	Child
23	27	6	Full thickness	Child
24	1	11	Superficial partial thickness	Child
24	2	12	Superficial partial thickness	Child
24	3	16	Superficial partial thickness	Child
24	4	9	Deep partial thickness	Child
24	5	15	Mid partial thickness/indeterminate	Child
24	6	13	Mid partial thickness/indeterminate	Child
24	7	12	Mid partial thickness/indeterminate	Child
24	8	13	Superficial partial thickness	Child
24	9	13	Mid partial thickness/indeterminate	Child
24	10	12	Deep partial thickness	Child
24	11	15	Mid partial thickness/indeterminate	Child
24	12	20	Mid partial thickness/indeterminate	Child
24	13	10	Superficial partial thickness	Child
24	14	10	Mid partial thickness/indeterminate	Child
24	15	9	Mid partial thickness/indeterminate	Child
24	16	18	Mid partial thickness/indeterminate	Child
24	17	18	Deep partial thickness	Child
24	18	17	Superficial partial thickness	Child
24	19	18	Mid partial thickness/indeterminate	Child
24	20	15	Superficial partial thickness	Child
24	21	16	Mid partial thickness/indeterminate	Child
24	22	20	Mid partial thickness/indeterminate	Child
24	23	10	Mid partial thickness/indeterminate	Child
24	24	16	Superficial partial thickness	Child
24	25	18	Deep partial thickness	Child
24	26	10	Mid partial thickness/indeterminate	Child
24	27	13	Superficial partial thickness	Child
25	1	12	Mid partial thickness/indeterminate	Child
25	2	15	Mid partial thickness/indeterminate	Child
25	3	13	Superficial partial thickness	Child
25	4	13	Deep partial thickness	Child
25	5	16	Deep partial thickness	Child
25	6	12	Mid partial thickness/indeterminate	Child
25	7	11	Deep partial thickness	Child
25	8	13	Superficial partial thickness	Child
25	9	10	Deep partial thickness	Child
25	10	10	Mid partial thickness/indeterminate	Child
25	11	15	Deep partial thickness	Child
25	12	20	Deep partial thickness	Child
25	13	10	Deep partial thickness	Child
25	14	10	Deep partial thickness	Child
25	15	13	Mid partial thickness/indeterminate	Child
25	16	15	Deep partial thickness	Child
25	17	16	Deep partial thickness	Child
25	18	16	Full thickness	Child
25	19	18	Mid partial thickness/indeterminate	Child
25	20	16	Mid partial thickness/indeterminate	Child
25	21	7	Deep partial thickness	Child
25	22	25	Mid partial thickness/indeterminate	Child
25	23	8	Deep partial thickness	Child
25	24	16	Mid partial thickness/indeterminate	Child
25	25	18	Deep partial thickness	Child
25	26	10	Deep partial thickness	Child
25	27	13	Mid partial thickness/indeterminate	Child
26	1	6	Mid partial thickness/indeterminate	Adult
26	2	13	Mid partial thickness/indeterminate	Adult
26	3	7	Mid partial thickness/indeterminate	Adult
26	4	12	Deep partial thickness	Adult
26	5	9	Mid partial thickness/indeterminate	Adult
26	6	11	Mid partial thickness/indeterminate	Adult
26	7	5	Mid partial thickness/indeterminate	Adult
26	8	6	Superficial partial thickness	Adult
26	9	11	Deep partial thickness	Adult
26	10	6	Deep partial thickness	Adult
26	11	9	Mid partial thickness/indeterminate	Adult
26	12	14	Deep partial thickness	Adult
26	13	5	Deep partial thickness	Adult
26	14	7	Mid partial thickness/indeterminate	Adult
26	15	9	Full thickness	Adult
26	16	5	Mid partial thickness/indeterminate	Adult
26	17	12	Deep partial thickness	Adult
26	18	6	Mid partial thickness/indeterminate	Adult
26	19	7	Mid partial thickness/indeterminate	Adult
26	20	20	Mid partial thickness/indeterminate	Adult
26	21	5	Deep partial thickness	Adult
26	22	8	Mid partial thickness/indeterminate	Adult
26	23	8	Deep partial thickness	Adult
26	24	14	Mid partial thickness/indeterminate	Adult
26	25	10	Deep partial thickness	Adult
26	26	8	Deep partial thickness	Adult
26	27	8	Mid partial thickness/indeterminate	Adult
27	1	11	Full thickness	Adult
27	2	17	Deep partial thickness	Adult
27	3	11	Superficial partial thickness	Adult
27	4	15	Full thickness	Adult
27	5	21	Mid partial thickness/indeterminate	Adult
27	6	21	Full thickness	Adult
27	7	12	Mid partial thickness/indeterminate	Adult
27	8	13	Mid partial thickness/indeterminate	Adult
27	9	10	Deep partial thickness	Adult
27	10	20	Deep partial thickness	Adult
27	11	10	Deep partial thickness	Adult
27	12	18	Full thickness	Adult
27	13	6.5	Full thickness	Adult
27	14	11	Full thickness	Adult
27	15	13	Full thickness	Adult
27	16	18	Full thickness	Adult
27	17	17	Full thickness	Adult
27	18	13.5	Deep partial thickness	Adult
27	19	22	Full thickness	Adult
27	20	18	Mid partial thickness/indeterminate	Adult
27	21	13	Full thickness	Adult
27	22	15	Deep partial thickness	Adult
27	23	12	Deep partial thickness	Adult
27	24	12	Mid partial thickness/indeterminate	Adult
27	25	12	Full thickness	Adult
27	26	12	Deep partial thickness	Adult
27	27	14	Full thickness	Adult
28	1	15	Mid partial thickness/indeterminate	Adult
28	2	17	Superficial partial thickness	Adult
28	3	10	Superficial partial thickness	Adult
28	4	32	Deep partial thickness	Adult
28	5	16	Mid partial thickness/indeterminate	Adult
28	6	22	Deep partial thickness	Adult
28	7	-	-	Adult
28	8	5	Mid partial thickness/indeterminate	Adult
28	9	20	Deep partial thickness	Adult
28	10	22	Mid partial thickness/indeterminate	Adult
28	11	30	Mid partial thickness/indeterminate	Adult
28	12	30	Superficial partial thickness	Adult
28	13	13	-	Adult
28	14	5	Mid partial thickness/indeterminate	Adult
28	15	20	Mid partial thickness/indeterminate	Adult
28	16	5	Mid partial thickness/indeterminate	Adult
28	17	20	Deep partial thickness	Adult
28	18	18	Deep partial thickness	Adult
28	19	27	Full thickness	Adult
28	20	15	Mid partial thickness/indeterminate	Adult
28	21	18	Superficial partial thickness	Adult
28	22	20	Mid partial thickness/indeterminate	Adult
28	23	7	Mid partial thickness/indeterminate	Adult
28	24	17	Mid partial thickness/indeterminate	Adult
28	25	18	Deep partial thickness	Adult
28	26	10	Superficial partial thickness	Adult
28	27	10	Deep partial thickness	Adult
29	1	23	Deep partial thickness	Adult
29	2	26	Full thickness	Adult
29	3	18	Superficial partial thickness	Adult
29	4	25	Deep partial thickness	Adult
29	5	28	Mid partial thickness/indeterminate	Adult
29	6	32.5	Deep partial thickness	Adult
29	7	20	-	Adult
29	8	16	-	Adult
29	9	25	Mid partial thickness/indeterminate	Adult
29	10	27	Deep partial thickness	Adult
29	11	36	Deep partial thickness	Adult
29	12	40	Full thickness	Adult
29	13	13	-	Adult
29	14	21	Full thickness	Adult
29	15	30	Deep partial thickness	Adult
29	16	-	Deep partial thickness	Adult
29	17	20	Full thickness	Adult
29	18	25	Full thickness	Adult
29	19	36	Full thickness	Adult
29	20	40	Full thickness	Adult
29	21	19	Full thickness	Adult
29	22	31	Mid partial thickness/indeterminate	Adult
29	23	26	Deep partial thickness	Adult
29	24	24	Deep partial thickness	Adult
29	25	20	Full thickness	Adult
29	26	25	Superficial partial thickness	Adult
29	27	20	Deep partial thickness	Adult
30	1	4	Superficial partial thickness	Adult
30	2	6	Superficial partial thickness	Adult
30	3	4	Superficial partial thickness	Adult
30	4	4	Deep partial thickness	Adult
30	5	6	Superficial partial thickness	Adult
30	6	7	Superficial partial thickness	Adult
30	7	4	Superficial partial thickness	Adult
30	8	2	Superficial partial thickness	Adult
30	9	5	Mid partial thickness/indeterminate	Adult
30	10	5	Mid partial thickness/indeterminate	Adult
30	11	9	Mid partial thickness/indeterminate	Adult
30	12	15	Mid partial thickness/indeterminate	Adult
30	13	3	Superficial partial thickness	Adult
30	14	4	Superficial partial thickness	Adult
30	15	5	Deep partial thickness	Adult
30	16	7	Superficial partial thickness	Adult
30	17	7	Deep partial thickness	Adult
30	18	4	Mid partial thickness/indeterminate	Adult
30	19	9	Mid partial thickness/indeterminate	Adult
30	20	6	Mid partial thickness/indeterminate	Adult
30	21	4.5	Superficial partial thickness	Adult
30	22	6	Mid partial thickness/indeterminate	Adult
30	23	3	Mid partial thickness/indeterminate	Adult
30	24	5	Mid partial thickness/indeterminate	Adult
30	25	5	Deep partial thickness	Adult
30	26	3	Mid partial thickness/indeterminate	Adult
30	27	4	Mid partial thickness/indeterminate	Adult
31	1	3	Superficial partial thickness	Adult
31	2	3	Superficial partial thickness	Adult
31	3	5	Superficial partial thickness	Adult
31	4	7	Mid partial thickness/indeterminate	Adult
31	5	3	Mid partial thickness/indeterminate	Adult
31	6	5	Superficial partial thickness	Adult
31	7	4	Deep partial thickness	Adult
31	8	3	Mid partial thickness/indeterminate	Adult
31	9	5	Mid partial thickness/indeterminate	Adult
31	10	9	Deep partial thickness	Adult
31	11	4.5	Mid partial thickness/indeterminate	Adult
31	12	10	Superficial partial thickness	Adult
31	13	2	Superficial partial thickness	Adult
31	14	4	Superficial partial thickness	Adult
31	15	8	Deep partial thickness	Adult
31	16	7	Mid partial thickness/indeterminate	Adult
31	17	4	Mid partial thickness/indeterminate	Adult
31	18	4.5	Superficial partial thickness	Adult
31	19	5	Mid partial thickness/indeterminate	Adult
31	20	7	Superficial partial thickness	Adult
31	21	4	Mid partial thickness/indeterminate	Adult
31	22	7	Superficial partial thickness	Adult
31	23	6	Deep partial thickness	Adult
31	24	6	Mid partial thickness/indeterminate	Adult
31	25	6	Deep partial thickness	Adult
31	26	5	Mid partial thickness/indeterminate	Adult
31	27	5	Mid partial thickness/indeterminate	Adult
32	1	5	Superficial partial thickness	Adult
32	2	2	Mid partial thickness/indeterminate	Adult
32	3	2.5	Mid partial thickness/indeterminate	Adult
32	4	6	Superficial partial thickness	Adult
32	5	5	Mid partial thickness/indeterminate	Adult
32	6	4	Mid partial thickness/indeterminate	Adult
32	7	-	-	Adult
32	8	2	Mid partial thickness/indeterminate	Adult
32	9	4	Superficial partial thickness	Adult
32	10	7	Full thickness	Adult
32	11	5	Deep partial thickness	Adult
32	12	6	Mid partial thickness/indeterminate	Adult
32	13	2	-	Adult
32	14	3	Mid partial thickness/indeterminate	Adult
32	15	5	Superficial partial thickness	Adult
32	16	3	Deep partial thickness	Adult
32	17	4	Mid partial thickness/indeterminate	Adult
32	18	4	Mid partial thickness/indeterminate	Adult
32	19	8	Deep partial thickness	Adult
32	20	4	Mid partial thickness/indeterminate	Adult
32	21	3.5	Superficial partial thickness	Adult
32	22	5	Deep partial thickness	Adult
32	23	3	Deep partial thickness	Adult
32	24	8	Deep partial thickness	Adult
32	25	3	Full thickness	Adult
32	26	3	Mid partial thickness/indeterminate	Adult
32	27	2.5	Full thickness	Adult
33	1	6	Full thickness	Adult
33	2	8	Full thickness	Adult
33	3	6	Full thickness	Adult
33	4	15	Full thickness	Adult
33	5	8	Full thickness	Adult
33	6	8	Full thickness	Adult
33	7	7	Full thickness	Adult
33	8	6	Full thickness	Adult
33	9	7	Full thickness	Adult
33	10	9	Full thickness	Adult
33	11	9	Full thickness	Adult
33	12	9	Full thickness	Adult
33	13	6	Full thickness	Adult
33	14	6	Full thickness	Adult
33	15	4.5	Deep partial thickness	Adult
33	16	15	Full thickness	Adult
33	17	7	Full thickness	Adult
33	18	7	Full thickness	Adult
33	19	18	Full thickness	Adult
33	20	14	Full thickness	Adult
33	21	8	Full thickness	Adult
33	22	10	Full thickness	Adult
33	23	7	Full thickness	Adult
33	24	10	Deep partial thickness	Adult
33	25	9	Full thickness	Adult
33	26	5.5	Full thickness	Adult
33	27	7	Full thickness	Adult
34	1	13	Full thickness	Adult
34	2	19	Full thickness	Adult
34	3	25	Full thickness	Adult
34	4	30	Full thickness	Adult
34	5	24	Full thickness	Adult
34	6	18	Full thickness	Adult
34	7	14	Full thickness	Adult
34	8	10	Full thickness	Adult
34	9	15	Full thickness	Adult
34	10	30	Full thickness	Adult
34	11	18	Deep partial thickness	Adult
34	12	20	Full thickness	Adult
34	13	12	Deep partial thickness	Adult
34	14	13	Full thickness	Adult
34	15	10	Deep partial thickness	Adult
34	16	15	Full thickness	Adult
34	17	16	Full thickness	Adult
34	18	15	Full thickness	Adult
34	19	18	Full thickness	Adult
34	20	25	Full thickness	Adult
34	21	17	Full thickness	Adult
34	22	34	Full thickness	Adult
34	23	25	Full thickness	Adult
34	24	15	Full thickness	Adult
34	25	18	Full thickness	Adult
34	26	15	Deep partial thickness	Adult
34	27	16	Full thickness	Adult
35	1	14	Mid partial thickness/indeterminate	Adult
35	2	12	Mid partial thickness/indeterminate	Adult
35	3	23	Superficial partial thickness	Adult
35	4	18	Full thickness	Adult
35	5	23	Mid partial thickness/indeterminate	Adult
35	6	16	Deep partial thickness	Adult
35	7	11	Mid partial thickness/indeterminate	Adult
35	8	10	Superficial partial thickness	Adult
35	9	16	Deep partial thickness	Adult
35	10	30	Deep partial thickness	Adult
35	11	18	Deep partial thickness	Adult
35	12	20	Deep partial thickness	Adult
35	13	12	Mid partial thickness/indeterminate	Adult
35	14	16	Deep partial thickness	Adult
35	15	18	Full thickness	Adult
35	16	14	Mid partial thickness/indeterminate	Adult
35	17	18	Mid partial thickness/indeterminate	Adult
35	18	16	Mid partial thickness/indeterminate	Adult
35	19	32	Deep partial thickness	Adult
35	20	20	Mid partial thickness/indeterminate	Adult
35	21	15	Deep partial thickness	Adult
35	22	17	Mid partial thickness/indeterminate	Adult
35	23	20	Deep partial thickness	Adult
35	24	16	Mid partial thickness/indeterminate	Adult
35	25	18	Mid partial thickness/indeterminate	Adult
35	26	11	Mid partial thickness/indeterminate	Adult
35	27	12	Mid partial thickness/indeterminate	Adult
36	1	4	Superficial partial thickness	Adult
36	2	7	Superficial partial thickness	Adult
36	3	3	Mid partial thickness/indeterminate	Adult
36	4	5	Deep partial thickness	Adult
36	5	5	Mid partial thickness/indeterminate	Adult
36	6	6	Superficial partial thickness	Adult
36	7	4	Mid partial thickness/indeterminate	Adult
36	8	3	Superficial partial thickness	Adult
36	9	5	Deep partial thickness	Adult
36	10	5	Deep partial thickness	Adult
36	11	8	Deep partial thickness	Adult
36	12	8	Superficial partial thickness	Adult
36	13	3	Mid partial thickness/indeterminate	Adult
36	14	3	Deep partial thickness	Adult
36	15	9	Deep partial thickness	Adult
36	16	8	Superficial partial thickness	Adult
36	17	9	Deep partial thickness	Adult
36	18	3	Mid partial thickness/indeterminate	Adult
36	19	8	Deep partial thickness	Adult
36	20	8	Mid partial thickness/indeterminate	Adult
36	21	5	Mid partial thickness/indeterminate	Adult
36	22	6	Mid partial thickness/indeterminate	Adult
36	23	5	Mid partial thickness/indeterminate	Adult
36	24	6	Mid partial thickness/indeterminate	Adult
36	25	5	Mid partial thickness/indeterminate	Adult
36	26	4	Deep partial thickness	Adult
36	27	5	Mid partial thickness/indeterminate	Adult
37	1	5	Superficial partial thickness	Adult
37	2	5	Superficial partial thickness	Adult
37	3	6	Mid partial thickness/indeterminate	Adult
37	4	5	Deep partial thickness	Adult
37	5	4.5	Deep partial thickness	Adult
37	6	6	Superficial partial thickness	Adult
37	7	3.5	Superficial partial thickness	Adult
37	8	4	Superficial partial thickness	Adult
37	9	5	Deep partial thickness	Adult
37	10	7	Deep partial thickness	Adult
37	11	9	Deep partial thickness	Adult
37	12	8	Mid partial thickness/indeterminate	Adult
37	13	4	Mid partial thickness/indeterminate	Adult
37	14	4	Mid partial thickness/indeterminate	Adult
37	15	6	Deep partial thickness	Adult
37	16	7	Superficial partial thickness	Adult
37	17	9	Deep partial thickness	Adult
37	18	4.5	Mid partial thickness/indeterminate	Adult
37	19	9	Full thickness	Adult
37	20	8	Mid partial thickness/indeterminate	Adult
37	21	5	Deep partial thickness	Adult
37	22	6	Mid partial thickness/indeterminate	Adult
37	23	6	Mid partial thickness/indeterminate	Adult
37	24	6	Deep partial thickness	Adult
37	25	4	Deep partial thickness	Adult
37	26	6	Deep partial thickness	Adult
37	27	5	Mid partial thickness/indeterminate	Adult
38	1	6	Full thickness	Adult
38	2	9	Full thickness	Adult
38	3	6	Mid partial thickness/indeterminate	Adult
38	4	8	Superficial partial thickness	Adult
38	5	6	Mid partial thickness/indeterminate	Adult
38	6	9	Full thickness	Adult
38	7	7	Mid partial thickness/indeterminate	Adult
38	8	7	Mid partial thickness/indeterminate	Adult
38	9	7	Mid partial thickness/indeterminate	Adult
38	10	12	Deep partial thickness	Adult
38	11	10	Deep partial thickness	Adult
38	12	16	Deep partial thickness	Adult
38	13	7	Full thickness	Adult
38	14	6	Deep partial thickness	Adult
38	15	18	Full thickness	Adult
38	16	10	Deep partial thickness	Adult
38	17	11	Full thickness	Adult
38	18	11	Full thickness	Adult
38	19	18	Full thickness	Adult
38	20	11	Full thickness	Adult
38	21	8	Full thickness	Adult
38	22	13	Deep partial thickness	Adult
38	23	6	Mid partial thickness/indeterminate	Adult
38	24	9	Mid partial thickness/indeterminate	Adult
38	25	9	Deep partial thickness	Adult
38	26	6	Deep partial thickness	Adult
38	27	8	Full thickness	Adult
39	1	10	Mid partial thickness/indeterminate	Adult
39	2	15	Mid partial thickness/indeterminate	Adult
39	3	13	Superficial partial thickness	Adult
39	4	15	Deep partial thickness	Adult
39	5	15	Mid partial thickness/indeterminate	Adult
39	6	15	Deep partial thickness	Adult
39	7	11	Mid partial thickness/indeterminate	Adult
39	8	10	Mid partial thickness/indeterminate	Adult
39	9	15	Deep partial thickness	Adult
39	10	14	Deep partial thickness	Adult
39	11	18	Mid partial thickness/indeterminate	Adult
39	12	22	Deep partial thickness	Adult
39	13	10	-	Adult
39	14	13	Mid partial thickness/indeterminate	Adult
39	15	18	Deep partial thickness	Adult
39	16	16	Mid partial thickness/indeterminate	Adult
39	17	16	Deep partial thickness	Adult
39	18	17	Mid partial thickness/indeterminate	Adult
39	19	18	Full thickness	Adult
39	20	18	Full thickness	Adult
39	21	12	Full thickness	Adult
39	22	18	Mid partial thickness/indeterminate	Adult
39	23	9	Deep partial thickness	Adult
39	24	16	Deep partial thickness	Adult
39	25	20	Deep partial thickness	Adult
39	26	15	Mid partial thickness/indeterminate	Adult
39	27	14	Deep partial thickness	Adult
40	1	11	Deep partial thickness	Adult
40	2	10	Mid partial thickness/indeterminate	Adult
40	3	14	Superficial partial thickness	Adult
40	4	15	Mid partial thickness/indeterminate	Adult
40	5	17	Mid partial thickness/indeterminate	Adult
40	6	14	Mid partial thickness/indeterminate	Adult
40	7	11	Full thickness	Adult
40	8	12	Superficial partial thickness	Adult
40	9	9	Mid partial thickness/indeterminate	Adult
40	10	14	Mid partial thickness/indeterminate	Adult
40	11	15	Mid partial thickness/indeterminate	Adult
40	12	24	Mid partial thickness/indeterminate	Adult
40	13	12	Superficial partial thickness	Adult
40	14	11	Deep partial thickness	Adult
40	15	12	Deep partial thickness	Adult
40	16	13	Superficial partial thickness	Adult
40	17	15	Deep partial thickness	Adult
40	18	14	Deep partial thickness	Adult
40	19	10	Mid partial thickness/indeterminate	Adult
40	20	10	Full thickness	Adult
40	21	13	Deep partial thickness	Adult
40	22	18	Mid partial thickness/indeterminate	Adult
40	23	11	Deep partial thickness	Adult
40	24	13	Superficial partial thickness	Adult
40	25	15	Deep partial thickness	Adult
40	26	12	Mid partial thickness/indeterminate	Adult
40	27	12	Deep partial thickness	Adult
41	1	2	Superficial partial thickness	Adult
41	2	4	Superficial partial thickness	Adult
41	3	3	Superficial partial thickness	Adult
41	4	5	Superficial partial thickness	Adult
41	5	5	Deep partial thickness	Adult
41	6	4.5	Mid partial thickness/indeterminate	Adult
41	7	-	-	Adult
41	8	2	-	Adult
41	9	5	Superficial partial thickness	Adult
41	10	4.5	Mid partial thickness/indeterminate	Adult
41	11	4.5	Mid partial thickness/indeterminate	Adult
41	12	11	Superficial partial thickness	Adult
41	13	3	-	Adult
41	14	3	-	Adult
41	15	4.5	Superficial partial thickness	Adult
41	16	4	Mid partial thickness/indeterminate	Adult
41	17	4.5	Mid partial thickness/indeterminate	Adult
41	18	2.5	Mid partial thickness/indeterminate	Adult
41	19	9	Mid partial thickness/indeterminate	Adult
41	20	4	-	Adult
41	21	2.5	Superficial partial thickness	Adult
41	22	4	Superficial partial thickness	Adult
41	23	3	Superficial partial thickness	Adult
41	24	3	Mid partial thickness/indeterminate	Adult
41	25	2	Superficial partial thickness	Adult
41	26	2.5	Superficial partial thickness	Adult
41	27	2.5	Superficial partial thickness	Adult
42	1	2	Mid partial thickness/indeterminate	Adult
42	2	3	Superficial partial thickness	Adult
42	3	2	Superficial partial thickness	Adult
42	4	5	Superficial partial thickness	Adult
42	5	3	Mid partial thickness/indeterminate	Adult
42	6	4.5	Superficial partial thickness	Adult
42	7	-	-	Adult
42	8	1.5	-	Adult
42	9	4	Superficial partial thickness	Adult
42	10	2	Mid partial thickness/indeterminate	Adult
42	11	3	Mid partial thickness/indeterminate	Adult
42	12	7	Mid partial thickness/indeterminate	Adult
42	13	2	-	Adult
42	14	2	Mid partial thickness/indeterminate	Adult
42	15	5	Superficial partial thickness	Adult
42	16	4	Mid partial thickness/indeterminate	Adult
42	17	2	Mid partial thickness/indeterminate	Adult
42	18	2.5	Mid partial thickness/indeterminate	Adult
42	19	9	Mid partial thickness/indeterminate	Adult
42	20	3	Mid partial thickness/indeterminate	Adult
42	21	2	Superficial partial thickness	Adult
42	22	3	Superficial partial thickness	Adult
42	23	2	Superficial partial thickness	Adult
42	24	2	Superficial partial thickness	Adult
42	25	3	Mid partial thickness/indeterminate	Adult
42	26	2.5	Superficial partial thickness	Adult
42	27	2	Superficial partial thickness	Adult
43	1	2.5	Mid partial thickness/indeterminate	Adult
43	2	5	Superficial partial thickness	Adult
43	3	2	Deep partial thickness	Adult
43	4	5	Mid partial thickness/indeterminate	Adult
43	5	3	Deep partial thickness	Adult
43	6	4.5	Full thickness	Adult
43	7	1.5	Mid partial thickness/indeterminate	Adult
43	8	2.5	Deep partial thickness	Adult
43	9	4	Deep partial thickness	Adult
43	10	5	Mid partial thickness/indeterminate	Adult
43	11	5	Deep partial thickness	Adult
43	12	10	Deep partial thickness	Adult
43	13	2.5	Full thickness	Adult
43	14	2	Full thickness	Adult
43	15	4	Deep partial thickness	Adult
43	16	4	-	Adult
43	17	3	Deep partial thickness	Adult
43	18	2.5	Deep partial thickness	Adult
43	19	4.5	Deep partial thickness	Adult
43	20	4	Deep partial thickness	Adult
43	21	3	Deep partial thickness	Adult
43	22	3	Mid partial thickness/indeterminate	Adult
43	23	3	Deep partial thickness	Adult
43	24	2.5	Mid partial thickness/indeterminate	Adult
43	25	3	Mid partial thickness/indeterminate	Adult
43	26	2	Mid partial thickness/indeterminate	Adult
43	27	3	Full thickness	Adult
44	1	2.5	mid partial thickness/indeterminate	Adult
44	2	3	Mid partial thickness/indeterminate	Adult
44	3	2	Superficial partial thickness	Adult
44	4	4	Full thickness	Adult
44	5	3	Mid partial thickness/indeterminate	Adult
44	6	5	Mid partial thickness/indeterminate	Adult
44	7	2	Superficial partial thickness	Adult
44	8	2	Superficial partial thickness	Adult
44	9	3	Mid partial thickness/indeterminate	Adult
44	10	5	Deep partial thickness	Adult
44	11	3	Deep partial thickness	Adult
44	12	6	Mid partial thickness/indeterminate	Adult
44	13	2	-	Adult
44	14	2	Mid partial thickness/indeterminate	Adult
44	15	5.5	Deep partial thickness	Adult
44	16	2	Mid partial thickness/indeterminate	Adult
44	17	3	Deep partial thickness	Adult
44	18	3	Deep partial thickness	Adult
44	19	4.5	Deep partial thickness	Adult
44	20	3	Mid partial thickness/indeterminate	Adult
44	21	2	Deep partial thickness	Adult
44	22	4	Mid partial thickness/indeterminate	Adult
44	23	2	Mid partial thickness/indeterminate	Adult
44	24	2	Mid partial thickness/indeterminate	Adult
44	25	2	Deep partial thickness	Adult
44	26	2.5	Mid partial thickness/indeterminate	Adult
44	27	3	Mid partial thickness/indeterminate	Adult
45	1	4	full thickness	Adult
45	2	4	Superficial partial thickness	Adult
45	3	4	Mid partial thickness/indeterminate	Adult
45	4	5	Mid partial thickness/indeterminate	Adult
45	5	2.5	Deep partial thickness	Adult
45	6	6	Superficial partial thickness	Adult
45	7	2	Mid partial thickness/indeterminate	Adult
45	8	2	Superficial partial thickness	Adult
45	9	4	Full thickness	Adult
45	10	6	Deep partial thickness	Adult
45	11	4	Mid partial thickness/indeterminate	Adult
45	12	9	Superficial partial thickness	Adult
45	13	3	Superficial partial thickness	Adult
45	14	2.5	Mid partial thickness/indeterminate	Adult
45	15	4	Deep partial thickness	Adult
45	16	4	Superficial partial thickness	Adult
45	17	4.5	Full thickness	Adult
45	18	2.5	Superficial partial thickness	Adult
45	19	9	Full thickness	Adult
45	20	7	Mid partial thickness/indeterminate	Adult
45	21	2	Mid partial thickness/indeterminate	Adult
45	22	4	Mid partial thickness/indeterminate	Adult
45	23	3	Mid partial thickness/indeterminate	Adult
45	24	3	Deep partial thickness	Adult
45	25	5	Deep partial thickness	Adult
45	26	5	Mid partial thickness/indeterminate	Adult
45	27	3	Deep partial thickness	Adult
46	1	2	Superficial partial thickness	Adult
46	2	3	Superficial partial thickness	Adult
46	3	2	Superficial partial thickness	Adult
46	4	3	Mid partial thickness/indeterminate	Adult
46	5	2	Superficial partial thickness	Adult
46	6	2	Superficial partial thickness	Adult
46	7	1	Superficial partial thickness	Adult
46	8	1	Superficial partial thickness	Adult
46	9	3	Superficial partial thickness	Adult
46	10	1	Mid partial thickness/indeterminate	Adult
46	11	2	Superficial partial thickness	Adult
46	12	4	Superficial partial thickness	Adult
46	13	1	-	Adult
46	14	0.5	Mid partial thickness/indeterminate	Adult
46	15	1	Superficial partial thickness	Adult
46	16	1	Superficial partial thickness	Adult
46	17	2	Superficial partial thickness	Adult
46	18	1	Superficial partial thickness	Adult
46	19	2	Mid partial thickness/indeterminate	Adult
46	20	1	Superficial partial thickness	Adult
46	21	1.5	Superficial partial thickness	Adult
46	22	4	Superficial partial thickness	Adult
46	23	1	Superficial partial thickness	Adult
46	24	1	Mid partial thickness/indeterminate	Adult
46	25	0.5	Superficial partial thickness	Adult
46	26	0.75	Mid partial thickness/indeterminate	Adult
46	27	2	Superficial partial thickness	Adult
47	1	3	Superficial partial thickness	Adult
47	2	4	Superficial partial thickness	Adult
47	3	3	Superficial partial thickness	Adult
47	4	4	Mid partial thickness/indeterminate	Adult
47	5	3	Mid partial thickness/indeterminate	Adult
47	6	4.5	Superficial partial thickness	Adult
47	7	3	Superficial partial thickness	Adult
47	8	2	Superficial partial thickness	Adult
47	9	4	Deep partial thickness	Adult
47	10	4	Mid partial thickness/indeterminate	Adult
47	11	5	Deep partial thickness	Adult
47	12	5	Mid partial thickness/indeterminate	Adult
47	13	3	Mid partial thickness/indeterminate	Adult
47	14	4	Mid partial thickness/indeterminate	Adult
47	15	5	Full thickness	Adult
47	16	4	Mid partial thickness/indeterminate	Adult
47	17	4.5	Deep partial thickness	Adult
47	18	9	Mid partial thickness/indeterminate	Adult
47	19	1	Deep partial thickness	Adult
47	20	3	Superficial partial thickness	Adult
47	21	3.5	Deep partial thickness	Adult
47	22	4	Mid partial thickness/indeterminate	Adult
47	23	3	Mid partial thickness/indeterminate	Adult
47	24	4	Deep partial thickness	Adult
47	25	4.5	Deep partial thickness	Adult
47	26	3	Mid partial thickness/indeterminate	Adult
47	27	3.5	Mid partial thickness/indeterminate	Adult
48	1	3	Mid partial thickness/indeterminate	Adult
48	2	4	Superficial partial thickness	Adult
48	3	3	Superficial partial thickness	Adult
48	4	5	Deep partial thickness	Adult
48	5	4	Mid partial thickness/indeterminate	Adult
48	6	4.5	Mid partial thickness/indeterminate	Adult
48	7	4	Deep partial thickness	Adult
48	8	2	Superficial partial thickness	Adult
48	9	5	Deep partial thickness	Adult
48	10	8	Mid partial thickness/indeterminate	Adult
48	11	4.5	Mid partial thickness/indeterminate	Adult
48	12	5	Superficial partial thickness	Adult
48	13	3	Mid partial thickness/indeterminate	Adult
48	14	4	Deep partial thickness	Adult
48	15	4	Mid partial thickness/indeterminate	Adult
48	16	4	Mid partial thickness/indeterminate	Adult
48	17	4.5	Mid partial thickness/indeterminate	Adult
48	18	9	Mid partial thickness/indeterminate	Adult
48	19	1	Mid partial thickness/indeterminate	Adult
48	20	4	Superficial partial thickness	Adult
48	21	3.5	Mid partial thickness/indeterminate	Adult
48	22	5	Superficial partial thickness	Adult
48	23	4	Mid partial thickness/indeterminate	Adult
48	24	4	Superficial partial thickness	Adult
48	25	4.5	Deep partial thickness	Adult
48	26	3.5	Superficial partial thickness	Adult
48	27	3.5	Deep partial thickness	Adult
49	1	4.5	Mid partial thickness/indeterminate	Adult
49	2	5	Mid partial thickness/indeterminate	Adult
49	3	3	Superficial partial thickness	Adult
49	4	10	Full thickness	Adult
49	5	5	Mid partial thickness/indeterminate	Adult
49	6	4.5	Deep partial thickness	Adult
49	7	3.5	-	Adult
49	8	3	Superficial partial thickness	Adult
49	9	5	Mid partial thickness/indeterminate	Adult
49	10	9	Deep partial thickness	Adult
49	11	9	Deep partial thickness	Adult
49	12	5	Mid partial thickness/indeterminate	Adult
49	13	3	Mid partial thickness/indeterminate	Adult
49	14	5	Deep partial thickness	Adult
49	15	5	Full thickness	Adult
49	16	4	Mid partial thickness/indeterminate	Adult
49	17	4.5	Deep partial thickness	Adult
49	18	9	Mid partial thickness/indeterminate	Adult
49	19	1	Deep partial thickness	Adult
49	20	4	Mid partial thickness/indeterminate	Adult
49	21	3.5	Deep partial thickness	Adult
49	22	5	Mid partial thickness/indeterminate	Adult
49	23	3	Deep partial thickness	Adult
49	24	4.5	Mid partial thickness/indeterminate	Adult
49	25	5	Full thickness	Adult
49	26	4	Superficial partial thickness	Adult
49	27	4	Full thickness	Adult
50	1	5	Mid partial thickness/indeterminate	Adult
50	2	5	Superficial partial thickness	Adult
50	3	5	Superficial partial thickness	Adult
50	4	5	Full thickness	Adult
50	5	4.5	Superficial partial thickness	Adult
50	6	4.5	Superficial partial thickness	Adult
50	7	3.5	Deep partial thickness	Adult
50	8	3	Superficial partial thickness	Adult
50	9	5	Deep partial thickness	Adult
50	10	4.5	-	Adult
50	11	5	Deep partial thickness	Adult
50	12	5	Deep partial thickness	Adult
50	13	2	Deep partial thickness	Adult
50	14	4.5	Mid partial thickness/indeterminate	Adult
50	15	4.5	Full thickness	Adult
50	16	4	Mid partial thickness/indeterminate	Adult
50	17	4.5	Deep partial thickness	Adult
50	18	9	Deep partial thickness	Adult
50	19	1	Deep partial thickness	Adult
50	20	5	Mid partial thickness/indeterminate	Adult
50	21	4	Deep partial thickness	Adult
50	22	6	Superficial partial thickness	Adult
50	23	4	Deep partial thickness	Adult
50	24	4.5	Mid partial thickness/indeterminate	Adult
50	25	5	Mid partial thickness/indeterminate	Adult
50	26	3.5	Mid partial thickness/indeterminate	Adult
50	27	4	Mid partial thickness/indeterminate	Adult
51	1	5.5	Full thickness	Adult
51	2	5	Superficial partial thickness	Adult
51	3	5	Deep partial thickness	Adult
51	4	5	Mid partial thickness/indeterminate	Adult
51	5	5	Mid partial thickness/indeterminate	Adult
51	6	5	Deep partial thickness	Adult
51	7	4	Deep partial thickness	Adult
51	8	3	Mid partial thickness/indeterminate	Adult
51	9	6	Deep partial thickness	Adult
51	10	9	Mid partial thickness/indeterminate	Adult
51	11	5	Deep partial thickness	Adult
51	12	8	Deep partial thickness	Adult
51	13	4	Full thickness	Adult
51	14	5	Full thickness	Adult
51	15	5	Mid partial thickness/indeterminate	Adult
51	16	5	Superficial partial thickness	Adult
51	17	5	Mid partial thickness/indeterminate	Adult
51	18	10	Deep partial thickness	Adult
51	19	1	Full thickness	Adult
51	20	5	Full thickness	Adult
51	21	4.5	Full thickness	Adult
51	22	6	Mid partial thickness/indeterminate	Adult
51	23	9	Deep partial thickness	Adult
51	24	5	Superficial partial thickness	Adult
51	25	5	Full thickness	Adult
51	26	4	Mid partial thickness/indeterminate	Adult
51	27	4	Full thickness	Adult
